1 **Functional characterization of the cnidarian antiviral immune response reveals ancestral**  
2 **complexity**

3

4 Magda Lewandowska<sup>1,\*</sup>, Ton Sharoni<sup>1</sup>, Yael Admoni<sup>1</sup>, Reuven Aharoni<sup>1</sup>, Yehu Moran<sup>1,\*</sup>

5

6 <sup>1</sup>Department of Ecology, Evolution and Behavior, Alexander Silberman Institute of Life Sciences,  
7 Faculty of Science, Hebrew University of Jerusalem, Jerusalem 9190401, Israel

8 \*Correspondence: [magda.lewandowska@mail.huji.ac.il](mailto:magda.lewandowska@mail.huji.ac.il) (M.L.); [yehu.moran@mail.huji.ac.il](mailto:yehu.moran@mail.huji.ac.il) (Y.M.)

9

10 **ABSTRACT**

11 Animals developed a broad repertoire of innate immune sensors and downstream effector  
12 cascades for defense against RNA viruses. Yet, this system highly varies between different bilaterian  
13 animals, masking its ancestral state. In this study we aimed to characterize the antiviral immune  
14 response of the cnidarian *Nematostella vectensis* and decipher the function of the retinoic acid-  
15 inducible gene I-like receptors (RLRs) known to detect viral double-stranded RNA (dsRNA) in  
16 bilaterians, but activate different antiviral pathways in vertebrates and nematodes. We show that a  
17 mimic of long viral dsRNA triggers a complex antiviral immune response bearing features distinctive  
18 for both vertebrate and invertebrate systems. Furthermore, the results of affinity assays and  
19 knockdown experiments provide functional evidence for the conserved role of RLRs in initiating  
20 immune response to dsRNA that originated before the cnidarian-bilaterian split and lay a strong  
21 foundation for future research on the evolution of the immune responses to RNA viruses.

22

## 23 Introduction

24 The immune system has long been known for its remarkable patterns of rapid evolution owing to  
25 strong selective drivers such as fast-evolving pathogens<sup>1,2</sup>. Thus, revealing conservation among  
26 phylogenetically distant lineages can provide unprecedented insights into the evolution of these  
27 defense mechanisms. For instance, it has been recently reported that both eukaryotic antiviral DNA-  
28 sensing mechanism driven by cGAS-STING axis and the downstream inhibitors of virus replication  
29 called viperins have originated in procaryotes as anti-bacteriophage mechanisms<sup>3-5</sup>. Viruses are very  
30 often sensed by their nucleic acids which bear features not shared by their host cells<sup>6,7</sup>. Specifically,  
31 eukaryotes had to adapt to emerging RNA viruses by developing strategies to recognize such non-self  
32 genetic material. The best characterized foreign features are i) double-stranded RNA (dsRNA)  
33 structures and ii) triphosphate on 5' ends, both of which are mostly absent during host cell  
34 homeostasis but are accumulated in viral infection, either directly derived from the viral genomes or  
35 formed as the replication or transcription intermediates<sup>8-10</sup>. In plants, nematodes and arthropods, the  
36 presence of the cytoplasmatic dsRNA triggers RNA interference (RNAi) which involves slicing  
37 dsRNA into short interfering RNAs (siRNA) by the ribonuclease III Dicer, often followed by signal  
38 amplification by RNA-dependent RNA polymerases (RdRPs) and final silencing of viral RNA by  
39 Argonaute proteins<sup>11-14</sup>. In vertebrates, dsRNA is detected by several families of pattern-recognition  
40 receptors (PRRs) which trigger downstream expression of type I interferons (IFNs) and other  
41 proinflammatory cytokines<sup>7</sup>. Retinoic acid-inducible gene I (RIG-I) -like receptors (RLRs) is a family  
42 of metazoan-specific ATP-dependent DExD/H box RNA helicases that function as the major  
43 cytoplasmic PRRs binding dsRNA<sup>15-17</sup> (**Fig. 1a**). In vertebrates, ligands of RIG-I and its paralog  
44 melanoma differentiation-associated protein 5 (MDA5) include short, blunt-end dsRNA with 5' di-  
45 and triphosphate<sup>9,18-22</sup> and long irregular dsRNA<sup>23-26</sup>, respectively. Caspase activation and recruitment  
46 domains (CARDs) of RIG-I and MDA5 (**Fig. 1b**) are necessary for regulation, oligomerization and  
47 subsequent interaction with adaptor molecules to trigger downstream effector cascades<sup>27</sup>. Absence of  
48 the CARD domain in the third vertebrate RLR – Laboratory of Genetics and Physiology 2 (LGP2) –  
49 prevents signal transduction and is correlated with its dual regulatory functions<sup>28</sup>.

50 Although RLRs have been found in many animal phyla (**Fig. 1a**) and display structural  
51 conservation (**Fig. 1b**), their function in invertebrate immune response remains understudied in  
52 animals other than vertebrates and nematodes, leaving a major gap in the understanding of RLRs  
53 evolution. In this study we aimed to characterize the immune response to viral dsRNA mimics in  
54 *Nematostella vectensis*, a model organism of phylum Cnidaria (sea anemones, corals, jellyfish and  
55 hydroids) separated from its sister group Bilateria (the majority of extant animals, including  
56 vertebrates and nematodes) by > 600 million years of evolution<sup>29,30</sup>. We observe in this cnidarian a  
57 strong immune response triggered by long, but not short 5' triphosphate-bearing dsRNA which  
58 supports our phylogenetic analyses of RLRs. We show that both *N. vectensis* RLRs (NveRLRs) are  
59 likely to take part in the antiviral immune response and that one of them is showing affinity to long  
60 dsRNA. Finally, knockdown of this RLR results in impaired downstream effector processes  
61 suggesting its key role in initiating immune response to dsRNA.

## 62 **Results**

### 63 **Ancestral RLRs duplication likely predates the Bilateria-Cnidaria split**

64 In order to gain a better understanding of the evolutionary fate of RLRs and the position of *N.*  
65 *vectensis* homologs within the family of these viral nucleic acid sensors, we reconstructed previous  
66 phylogenetic trees with an addition of numerous recently available sequences. Instead of including  
67 other distantly related DExD/H helicases, such as RNA-specific endoribonuclease Dicer or elongation  
68 initiation factor 4A (eIF4A), we performed phylogenetic analysis exclusively of RLRs with the  
69 sequences of sponges, one of the first two metazoan phyla to diverge<sup>31,32</sup>, set as an outgroup (**Fig. 1a**).  
70 Similar to previous studies<sup>33,34</sup>, we have not identified any RLRs homologs in Placozoa and  
71 Ctenophora. Within Cnidaria, we identified RLRs sequences in Hexacorallia (sea anemones and stony  
72 corals) while they are absent in the Meduzosoa clade, clearly indicating a loss. Interestingly, unlike in  
73 previous studies<sup>33,34</sup>, we observed a well-supported clustering of all hexacorallian RLRs within  
74 bilaterian MDA5/LGP2 clade, which forms a sister group to bilaterian RIG-I sequences. This  
75 unexpected finding suggests that, in contrast to the previous hypothesis<sup>35</sup>, RLRs paralogs duplicated

76 before the split of Bilateria and Cnidaria and all cnidarian RLRs paralogs originated from a  
77 MDA5/LGP2 ancestral protein. Furthermore, both *Nematostella* CARD-containing protein sequences  
78 – NveRLRa and NveRLRb – are positioned in separated clades with orthologs from other sea  
79 anemones suggesting their ancient duplication predating sea anemone divergence and most likely the  
80 functional non-redundancy. Clustering of RLRb sequences of sea anemones within one of the clades  
81 of stony corals which have split 320 million years ago<sup>36</sup> further supports the hypothesis of an ancient  
82 sub- or neofunctionalization of the sea anemone RLRs.

### 83 **Lack of response in *Nematostella* to RIG-I specific ligand**

84 To functionally support our observation that *Nematostella* RLRs are closer related to Bilateria  
85 MDA5 receptor, we decided to first employ known ligand affinity and test *Nematostella* response to  
86 MDA5 and RIG-I-specific ligands. To this end, we microinjected *N. vectensis* embryos with  
87 polyinosinic:polycytidylic acid (poly(I:C)), a mimic of long viral dsRNA and a potent agonist of  
88 MDA5<sup>25,26</sup>, and a short dsRNA 19-mer with 5' triphosphate group (5'ppp-dsRNA) which is known to  
89 be detected by RIG-I<sup>9,19</sup>. Analysis of differentially expressed genes (DEG) upon the treatments with  
90 viral mimics revealed a strong response to poly(I:C) (**Fig. 2a, Supplementary File S1,**  
91 **Supplementary Fig. S1d,e**) with a peak of the differential expression at 24 hours post-injection (hpi)  
92 accounting for 67.26% of variance revealed by Principal Component 1 (**Fig. 3c**). Among 3 different  
93 time points, we have observed an almost complete lack of transcriptomic response in 6 hpi (*n* of DEG  
94 = 14) which agrees with a low transcript abundance at the onset of zygotic transcription in  
95 *Nematostella*<sup>37</sup>. Both at 24 and 48 hpi (*n* of DEG = 1475 and 524, respectively) the majority of DEG  
96 were upregulated (**Fig. 3a,b**) which is a common pattern of the innate immune response to viral  
97 ligands<sup>38</sup>. In contrast, the transcriptomic response to vertebrate RIG-I specific dsRNA ligand revealed  
98 a striking lack of signature of the antiviral immune processes (**Fig. 2b, Supplementary File 1,**  
99 **Supplementary Fig. S1a,b,c**) despite being applied at 90 – 180-fold higher concentration compared  
100 to concentrations used for vertebrates, suggesting that unlike in vertebrates<sup>39-41</sup>, a triphosphate group  
101 on 5' blunt-end of short dsRNA is not triggering an immune reaction in *N. vectensis*.

102 Results of the gene-set enrichment analysis (GSEA) revealed the abundance of gene ontology  
103 (GO) terms related to the innate immunity and strengthened our inference on strong antiviral response  
104 triggered by poly(I:C) at 24 hpi (**Fig. 3d, Supplementary File S2**) and to a lesser extent at 48 hpi  
105 (**Fig. 3e, Supplementary File S2**). Importantly, the vast majority of responding genes at the later  
106 stage overlaps with the upregulated genes of the former one (**Fig. 3a**), suggesting a continuous  
107 attenuating immune response. In all tested groups enriched GO terms contained many vertebrate-  
108 specific terms, therefore we had to treat it as an approximation to a true gene function. Although the  
109 GSEA for the short 5'ppp-dsRNA had not revealed enriched GO terms which would pass the  
110 statistical threshold likely due to the low DEG abundance (**Supplementary File S2**), we decided to  
111 examine the only DEG group responding to this treatment i.e. genes downregulated at 6 hpi (**Fig. 2b**).  
112 Identified GO terms groups were predominantly related to the early-stage development  
113 (**Supplementary Fig. S1f**) which led us to the hypothesis that the presence of very high molarity of  
114 charged compounds might either directly or indirectly interfere with the onset of zygotic transcription,  
115 possibly by altering the cellular pH or disrupting physiological processes through the divalent cations  
116 chelating activity<sup>42</sup>.

### 117 **Response to poly(I:C) reveals patterns of both invertebrate and vertebrate antiviral innate** 118 **immunity**

119 Among poly(I:C)-upregulated genes at 24 hpi we identified both of *Nematostella* RLRs, with  
120 more significant increase for *NveRLRb* (edgeR-based  $\log_2$  Fold Change (FC) = 3.275, False Discovery  
121 Rate (FDR) = 1.54e-20) than for *NveRLRa* (score below the fold change threshold, i.e. edgeR-based  
122  $\log_2$ FC = 1.864, FDR = 6.55e-09). This increase suggests a possibility of a feed-forward loop similar  
123 to that observed in vertebrate antiviral immune response<sup>43</sup>. Moreover, many genes linked to RNAi  
124 (e.g. *NveDicer1*, *NveAGO2*, *NveRdRPI-3*) and numerous homologs of genes involved in antiviral  
125 innate immune response in both vertebrates and invertebrates animals<sup>7,44</sup> (e.g. Interferon regulatory  
126 factors (IRFs), RNase L, guanylate-binding proteins (GBPs), 2'-5'-oligoadenylate synthetase 1  
127 (OAS1), nuclear factor kappa-light-chain-enhancer of activated B cells (NF- $\kappa$ B), radical SAM  
128 domain-containing 2 (Viperin), to mention few, **Supplementary File S1**) were also detected.

129 Interestingly, we observed a significant upregulation from a previously undescribed factor (gene  
130 symbol: NVE23912) which is a cysteine-rich sequence (11 cysteine residues) with a predicted signal  
131 peptide and no significant homology to any known genes. Our search for homologs in Transcriptome  
132 Shotgun Assembly (TSA) and NCBI nr databases revealed that it is likely a secreted hexacorallian-  
133 specific protein (**Supplementary Fig. S2**) which resembles pattern of proteins under strong selective  
134 pressure displayed by the high conservation limited to the cysteine positions. Altogether, the  
135 described features make it a good candidate for further functional studies which could validate  
136 whether this novel factor is playing an important role in the innate immunity of *N. vectensis* and  
137 possibly other members of Hexacorallia.

138 To get wider view of the nature of poly(I:C)-induced DEG we examined promoter sequences of  
139 the induced genes by two different approaches. First, we screened the coding strand for the presence  
140 of the TATA-box in both the close proximity to the transcription starting site (TSS) (38 bp) and in a  
141 more permissive screening window (100 bp upstream and 100 bp downstream of TSS). It has been  
142 previously suggested that mammalian immune-related genes which are rapidly diverging and exhibit  
143 greater levels of expression variability across individual cells, such as cytokines and chemokines,  
144 share a common promoter architecture enriched in TATA-boxes<sup>45</sup>. Interestingly, *N. vectensis* displays  
145 a significant increase in abundance of TATA-box elements in poly(I:C)-upregulated genes when  
146 searching both window sizes which seems to correlate with the level of genes inducibility  
147 (**Supplementary Fig. S3a,b, Supplementary File S3**). Within protein sequences of TATA-box  
148 containing genes, we predicted a similar enrichment of signal peptides suggesting that many of these  
149 proteins might be involved in secretory pathways (**Supplementary Fig. S3c,d, Supplementary file**  
150 **S3**). Furthermore, the search of known transcription factor binding sites (TFBS) revealed numerous  
151 motifs known to be involved in regulating transcription of antiviral immune-related genes in  
152 vertebrates such as those recognized by STATs, IRFs, NF- $\kappa$ B or members of ETS family<sup>46-49</sup>  
153 (**Supplementary File S3**). In order to circumvent the limitation of using the vertebrate motif matrix,  
154 we scanned the *N. vectensis* genome for the presence of the homologs of vertebrate immune-related  
155 transcription factors. Importantly, we have identified numerous candidate homologs of these factors in

156 *N. vectensis* genome among which a large group showed upregulation in response to poly(I:C)  
157 treatment supporting the notion that they might play role in orchestrating the observed immune  
158 response (**Supplementary File S3**).

### 159 **Role of NveRLRs in detecting long dsRNA**

160 To confirm the results of our RNA-seq DEG analysis we assayed gene expression in independent  
161 biological replicates. RT-qPCR analysis at 24 hpi validated the upregulation of *NveRLRs* (relative  
162 expression<sub>*NveRLRa*</sub> = 1.98, 95% CI, 1.042 – 3.494, p-value = 0.0425, relative expression<sub>*NveRLRb*</sub> = 5.795,  
163 95% CI, 3.992 – 8.411, p-value = 0.000643) (**Fig. 4a**), as well as several other putative immune-  
164 related genes (**Supplementary Fig. S4d, Supplementary File S4**) in response to poly(I:C) treatment,  
165 and an unaffected expression level of *NveRLRs* transcripts when treated with short 5'ppp-dsRNA  
166 (relative expression<sub>*NveRLRa*</sub> = 0.815, 95% CI, 0.468 – 1.420, p-value = 0.325, relative expression<sub>*NveRLRb*</sub>  
167 = 1.071, 95% CI, 0.528 – 2.173, p-value = 0.778) (**Fig. 4b**). Importantly, the examination of the  
168 *NveRLRs* mRNA levels in response to the control treatments did not reveal a significant background  
169 upregulation which could distort the results of ligand specificity (**Supplementary Fig. 5a,b**). To  
170 confirm these results at the protein level, we generated custom polyclonal antibodies against *N.*  
171 *vectensis* RLRs which specificity has been tested beforehand. NveRLRs levels were tested at 48 hpi in  
172 order to diminish the effect of maternally deposited proteins. The result of Western blot confirmed  
173 strong upregulation of both NveRLRs after poly(I:C) stimulation (**Fig. 4c,d**) which correlates with the  
174 increased transcript abundance.

175 Next, we aimed to examine the ability of NveRLRs to bind poly(I:C). To this end, we generated  
176 two *N. vectensis* transgenic lines, each expressing FLAG-tagged *NveRLR* and a fluorescent mCherry  
177 gene under a ubiquitous promoter of the TATA-Box Binding Protein (TBP) gene (**Fig. 5a**). Progeny  
178 of F<sub>1</sub> female heterozygotes and wild-type animals was collected directly after fertilization (0 h) and  
179 the presence of maternally deposited FLAG-tagged RLRs was confirmed (**Fig. 5b**). In vitro binding  
180 assays of poly(I:C) covalently linked to biotin on wild-type protein extracts confirmed specificity of  
181 mouse FLAG antibody (**Fig. 5c**). The results of the in vitro poly(I:C) binding on the transgenic lines

182 revealed a significant enrichment of NveRLRb in poly(I:C)-biotin pulldown samples indicating  
183 specific binding of long dsRNA by NveRLRb (**Fig. 5c**). Unexpectedly, no poly(I:C) affinity was  
184 detected when assaying NveRLRa (**Fig. 5d**). In order to monitor how accurately the conditions of  
185 transgenic expression mimic the native proteome composition, we examined levels of NveRLRs  
186 levels in recently published mass spectrometry data spanning different developmental stages of *N.*  
187 *vectensis*<sup>50</sup>. Interestingly, we noticed that while NveRLRb displays relatively stable expression  
188 throughout the lifecycle, levels of NveRLRa in the unfertilized egg are below the detection threshold  
189 (in agreement with previous proteomic studies of *Nematostella* eggs<sup>51,52</sup>) and show significantly lower  
190 expression than NveRLRb across all developmental stages (**Supplementary Fig. S6**). It is therefore  
191 plausible that NveRLRa carries regulatory function or binds yet uncharacterized ligands or,  
192 alternatively, that its ligand specificity matures along with the development due to co-expression of  
193 other crucial factors.

#### 194 **Knockdown of *NveRLRb* interferes with the *in vivo* response to long dsRNA**

195 Poly(I:C)-induced upregulation of *NveRLRs* both at the gene and the protein levels and  
196 FLAG:NveRLRb affinity to poly(I:C)-biotin led us to the assumption that both proteins might carry  
197 an important function in detecting viral dsRNA and hence, orchestrating downstream antiviral  
198 immune processes in *Nematostella*. To further corroborate this theory, we generated knockdown (KD)  
199 animals by microinjection of short hairpin RNA (shRNA) targeting 3 different regions of each of  
200 *NveRLRs*. The initial validation assays of KD efficiency and shRNAs immunogenicity revealed a  
201 strong (~85-90%) and moderate (~60%) effect of all *NveRLRb* and *NveRLRa* shRNAs, respectively  
202 (**Supplementary Fig. S5c,d**), and very low impact on the expression levels of putative immune-  
203 related genes of all shRNAs (**Supplementary Fig. S5e-j**). Due to the lack of strong knockdown effect  
204 by all candidate *NveRLRa* shRNAs, we decided to include all 3 tested variants for this gene and 2  
205 shRNAs for *NveRLRb*. Following the assumption that NveRLRs might act as sensors in antiviral  
206 immune response, we co-injected each shRNAs with poly(I:C) and tested at 48 hpi the mRNA levels  
207 of candidate genes previously proved to respond to the poly(I:C) treatment. We classified genes as  
208 those affected by *NveRLRs* KD when their expression was significantly different when compared to



209 control shRNA and obtained by at least two different shRNAs. The first unexpected observation was  
210 that while *NveRLRb* KD efficiency remained comparable to the initial screening assays (~90%),  
211 *NveRLRa* KD level decreased to approximately 45% (**Fig. 6a,b, Supplementary File S4**). Of note,  
212 none of the *NveRLRs* KD experiments exerted a strong and ubiquitous reciprocal effect on the other  
213 sensor. Importantly, knockdown of *NveRLRb* resulted in noticeable downregulation of both tested  
214 components of RNAi i.e. *NveDicer1* (relative expression<sub>shRNA1</sub> = 0.370, 95% CI, 0.242 – 0.565, p-  
215 value = 0.005; relative expression<sub>shRNA2</sub> = 0.165, 95% CI, 0.106 – 0.257, p-value = 0.001) and  
216 *NveAGO2* (relative expression<sub>shRNA1</sub> = 0.663, 95% CI, 0.53 – 0.83, p-value = 0.01; relative  
217 expression<sub>shRNA2</sub> = 0.451, 95% CI, 0.272 – 0.547, p-value = 0.00095), as well as *NveIRF1* (relative  
218 expression<sub>shRNA1</sub> = 0.401, 95% CI, 0.236 – 0.683, p-value = 0.012; relative expression<sub>shRNA2</sub> = 0.262,  
219 95% CI, 0.171 – 0.402, p-value = 0.00215) (**Fig. 6c,d,e, Supplementary File S4**) and an apparent but  
220 not significant decrease in expression of hexacorallian-specific factor NVE23912 (**Supplementary**  
221 **Fig. S4c, Supplementary File S4**). Interestingly, neither *NveOASI* nor *NveGBPI* mRNA levels were  
222 significantly affected by the *NveRLRb* shRNA-poly(I:C) co-injection (**Supplementary Fig. S4a,b,**  
223 **Supplementary File S4**). In contrast to *NveRLRb* KD, response to *NveRLRa* shRNAs did not reveal  
224 any clear signature of the impaired downstream process in 5 out of 6 tested genes and displayed a  
225 general pattern of high expression variation (**Fig. 6c,d, Supplementary Fig. S4a,b,c, Supplementary**  
226 **File S4**). Only *NveDicer1* mRNA levels displayed a mild decrease in response to the treatment  
227 (relative expression<sub>shRNA1</sub> = 0.718, 95% CI, 0.470 – 1.098, p-value = 0.0966; relative expression<sub>shRNA2</sub>  
228 = 0.695, 95% CI, 0.581 – 0.832, p-value = 0.0049; relative expression<sub>shRNA3</sub> = 0.693, 95% CI, 0.493 –  
229 0.972, p-value = 0.041) (**Fig. 6e, Supplementary File S4**). Altogether, our results indicate a strong  
230 link between the presence of *NveRLRb* and the ability to initiate downstream processes involving at  
231 least two key RNAi components i.e. *NveDicer1* and *NveAGO2* and a homolog of a known vertebrate  
232 IRF. Lack of effect of *NveRLRa* KD despite testing three shRNAs targeting different transcript  
233 regions together with the negative result of poly(I:C)-biotin binding assay suggest that *NveRLRa*  
234 might carry different functions.

235

## 236 Discussion

237 In this study, we examined transcriptomic response to two different viral dsRNA mimics in *N.*  
238 *vectensis* and aimed to elucidate the role of NveRLRs in the antiviral immune pathways. We observed  
239 a lack of any signature of the antiviral immune response to the canonical RIG-I agonist which  
240 supports our hypothesis about the evolution of cnidarian RLRs from ancestral MDA5/LGP2 precursor  
241 protein (**Fig. 1a**). In vertebrates, RIG-I binds to 5' ends of dsRNA and recognizes the presence of di-  
242 and triphosphate on 2'-O-unmethylated nucleotide, with a strong preference to the base-paired blunt  
243 ends<sup>9,18-22,53</sup>. In contrast, MDA5 is known to require a stable oligomerization along the dsRNA  
244 molecule for effective downstream signaling and hence, it displays a strong affinity to long molecules  
245 with at least partial stretches of dsRNA<sup>23-26</sup>. Of note, poly(I:C) is known to carry 5'-diphosphate in at  
246 least a fraction of the molecules due to the synthesis process, however, uneven length of annealed  
247 strands results in single-stranded ends and long, irregular dsRNA structures<sup>54</sup>. In light of our results, it  
248 is likely that the activation of NveRLRs depends on the molecule length rather than the 5' end  
249 recognition. To the best of our knowledge, the distinctive features of an effective RIG-I agonist have  
250 so far been only functionally characterized in vertebrates despite RLRs homologs being found in  
251 many invertebrate genomes. Therefore, further research on such non-vertebrate homologs can provide  
252 key insights into the evolution of dsRNA 5' end recognition.

253 Transcriptomic response to poly(I:C) revealed that many canonical vertebrate antiviral factors  
254 triggered by IFN, known as interferon-stimulated genes (ISGs)<sup>43</sup>, are also taking part in *Nematostella*  
255 immune response. Interestingly, we observed several intriguing features of promoter region  
256 architecture such as enrichment in the TATA box sequence in poly(I:C)-upregulated genes. These  
257 elements were previously shown to display analogies in orchestrating expression of rapidly diverging  
258 and transcriptionally variable genes in phylogenetically distant groups, such as mammals<sup>45</sup> and  
259 yeast<sup>55,56</sup>. On the other hand, response to poly(I:C) and KD experiments revealed similarities to  
260 antiviral invertebrate systems and suggested a link between NveRLRb and the RNAi pathway. Of  
261 note, a similar level of complexity and involvement of diverse antiviral mechanisms was previously  
262 suggested for the Pacific oyster *Crassostrea gigas*<sup>57-60</sup>, although the response to the canonical RLRs

263 ligands presented here has not yet been comprehensively characterized in this molluscan species. The  
264 interdependence of RLRs and RNAi has been functionally demonstrated in the model nematode  
265 *Caenorhabditis elegans*, where RLRs were shown to interact with Dicer and provide crucial  
266 assistance for RNAi machinery to produce primary and secondary antiviral siRNAs<sup>61-63</sup>. However,  
267 unlike most other bilaterian and cnidarian RLRs, the nematode receptors lack any CARD domains  
268 (**Fig. 1b**) that typify action via oligomerization rather than association with Dicer. Importantly, there  
269 is growing evidence that virus-host interactions involve other classes of small RNAs including Dicer-  
270 and AGO-dependent microRNAs (miRNAs)<sup>64</sup> and several studies in chordates suggested differential  
271 expression of host miRNAs in response to poly(I:C)<sup>65-68</sup>. We have recently demonstrated that the  
272 cargo of NveAGO1 is restricted to miRNAs, whereas NveAGO2 can carry both miRNAs and  
273 siRNAs<sup>69</sup>. This hints that poly(I:C)-upregulated NveAGO2 could function as the antiviral RNAi  
274 effector protein. Further studies will help to decipher the role of RNAi components in the antiviral  
275 immune response of *N. vectensis*.

276 The results of *NveRLRb* KD indicate that there are likely alternative immune cascades triggered  
277 by poly(I:C) administration which might be initiated by other dsRNA sensors. Among these, Toll-like  
278 receptors (TLRs) are obvious candidates due to their well-known role as PRRs<sup>70</sup>. However, the only  
279 TLR of *N. vectensis* has been recently shown to mediate immune response in NFκB-dependent way in  
280 response to *Vibrio coralliilyticus* and flagellin<sup>71</sup> which indicates its involvement in recognizing  
281 bacterial rather than viral pathogens. An intriguing question for future studies is whether NveRLRa is  
282 acting as a nucleic acid sensor. On one hand the stable co-existence of two separately-clustering RLRs  
283 paralogs in sea anemones (**Fig. 1a**) and the clear increase in *NveRLRa* expression upon poly(I:C)  
284 challenge (**Fig. 4a,c**) suggest that it is likely a functional component of antiviral immune response  
285 which might display affinity to yet uncharacterized ligands. Nonetheless, the short truncation of  
286 helicase domain and aberrant KD patterns suggest an alternative but not mutually exclusive  
287 hypothesis that NveRLRa might carry some regulatory functions involved in complex feedback  
288 mechanisms.

289        To the best of our knowledge, our study provides the first functional insights into the role of  
290        RLRs in a non-bilaterian animal. The initial results suggest that RLRs capacity to sense 5' end of  
291        dsRNA evolved in Bilateria, although further studies involving invertebrate RLRs will provide key  
292        answers on this matter. We show that *N. vectensis* response to a viral dsRNA mimic is characterized  
293        by high complexity and includes both vertebrate-like features, as well as invertebrate-like  
294        involvement of RNAi machinery in an RLR-dependent manner. This hints that key elements of both  
295        extant antiviral systems were already present in a cnidarian-bilaterian common ancestor. Our results  
296        lay the foundation for further functional studies on downstream effector mechanisms in *N. vectensis*  
297        which might provide key insights into the evolution of the antiviral immune response in Metazoa.

298

299

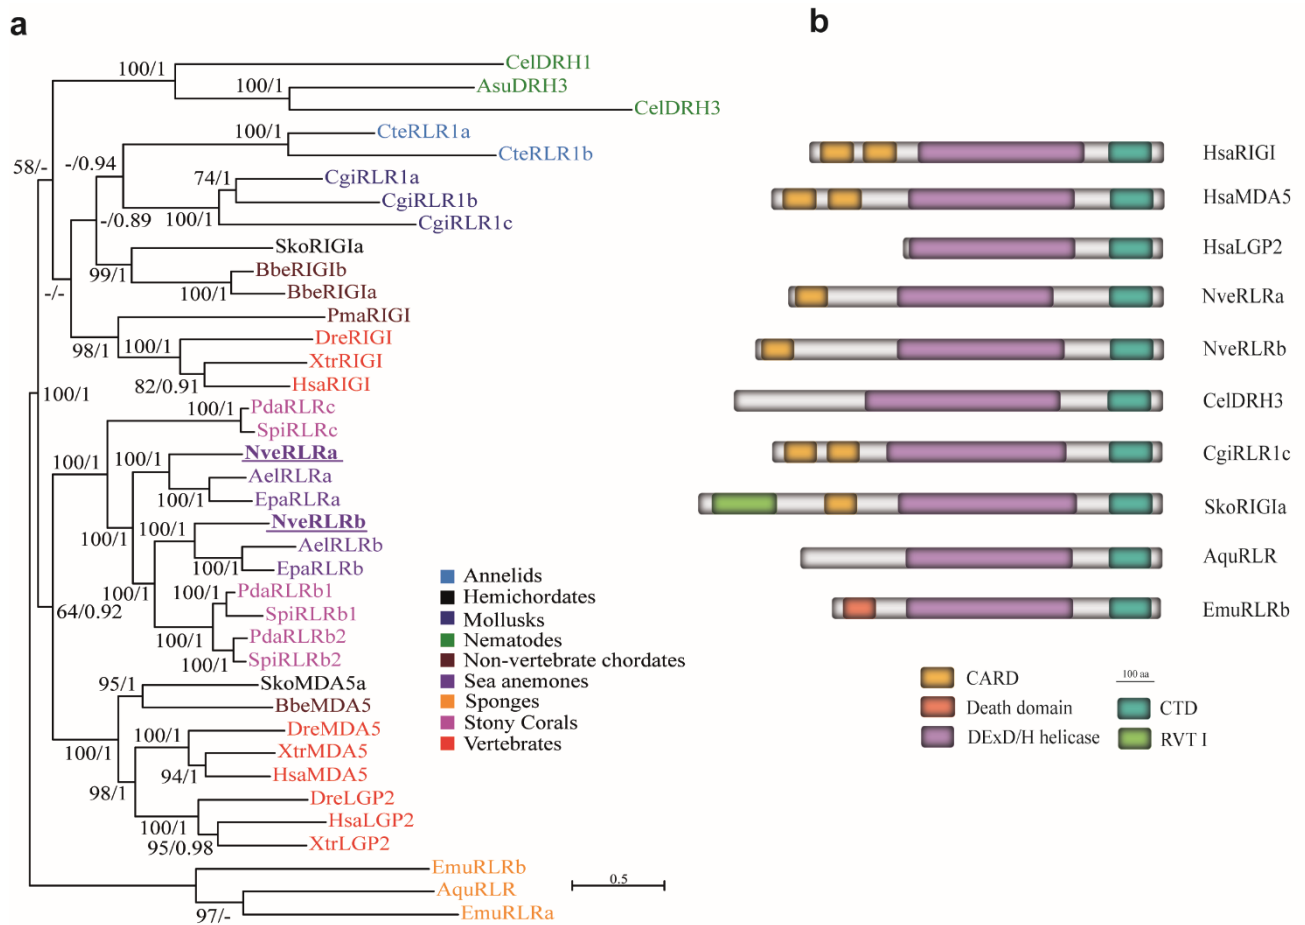

300

301 **Figure 1. Phylogenetic relationship of metazoan RLRs.** (a) Maximum likelihood and Bayesian  
 302 inference consensus phylogenetic tree of representative RLR sequences, bootstrap values above 50%  
 303 are presented for each node. Posterior probability values of a Bayesian tree of the same topology  
 304 between 0.85-1.0 are indicated for each node. Ael, *Anthopleura elegantissima*, Aqu, *Amphimedon*  
 305 *queenslandica*, Asu, *Ascaris suum*, Bbe, *Branchiostoma belcheri*, Cte, *Capitella teleta*, Cgi,  
 306 *Crassostrea gigas*, Cel, *Caenorhabditis elegans*, Dre, *Danio rerio*, Emu, *Ephydatia muelleri*, Epa,  
 307 *Exaiptasia pallida*, Has, *Homo sapiens*, Nve, *Nematostella vectensis*, Pda, *Pocillopora damicornis*,  
 308 Pma, *Petromyzon marinus*, Sti, *Stylophora pistillata*, Xtr, *Xenopus tropicalis*. (b) Schematic  
 309 representation of selected RLR representatives of major phylogenetic groups. CARD - caspase  
 310 recruitment domain; CTD - C-terminal domain; RVT I - reverse transcriptase.

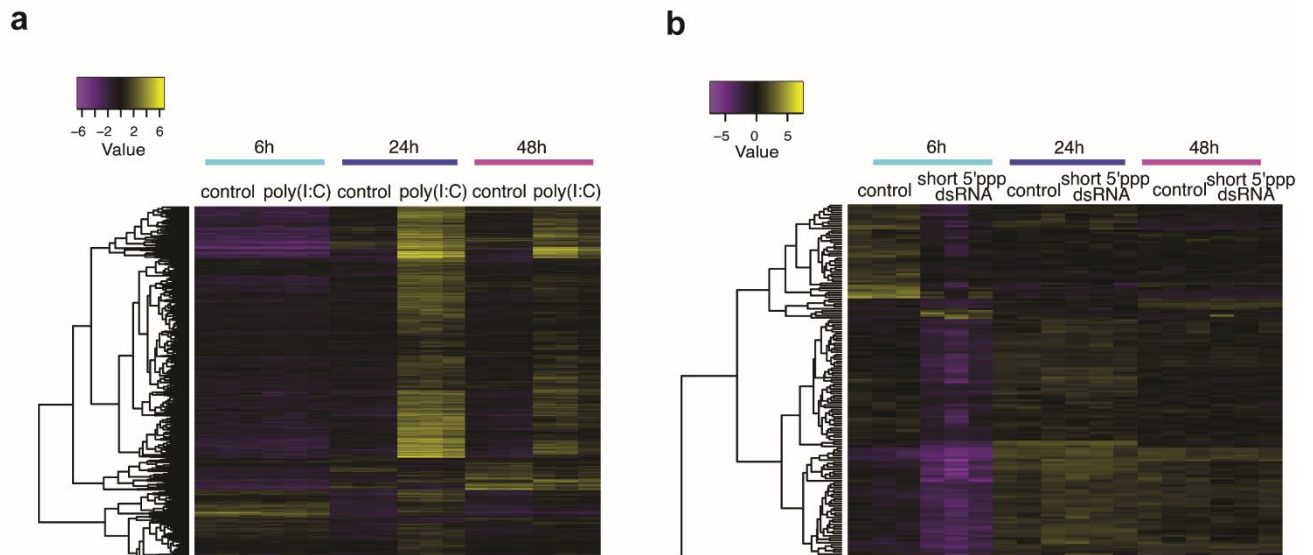

311

312 **Figure 2. Differential gene expression after microinjections of viral mimics.** Heatmap of  
313 differentially expressed genes upon administration of (a) poly(I:C) vs 0.9% NaCl serving as a control,  
314 and (b) 19-mer dsRNA with 5' triphosphate and 19-mer dsRNA with 5' hydroxyl group serving as a  
315 control.

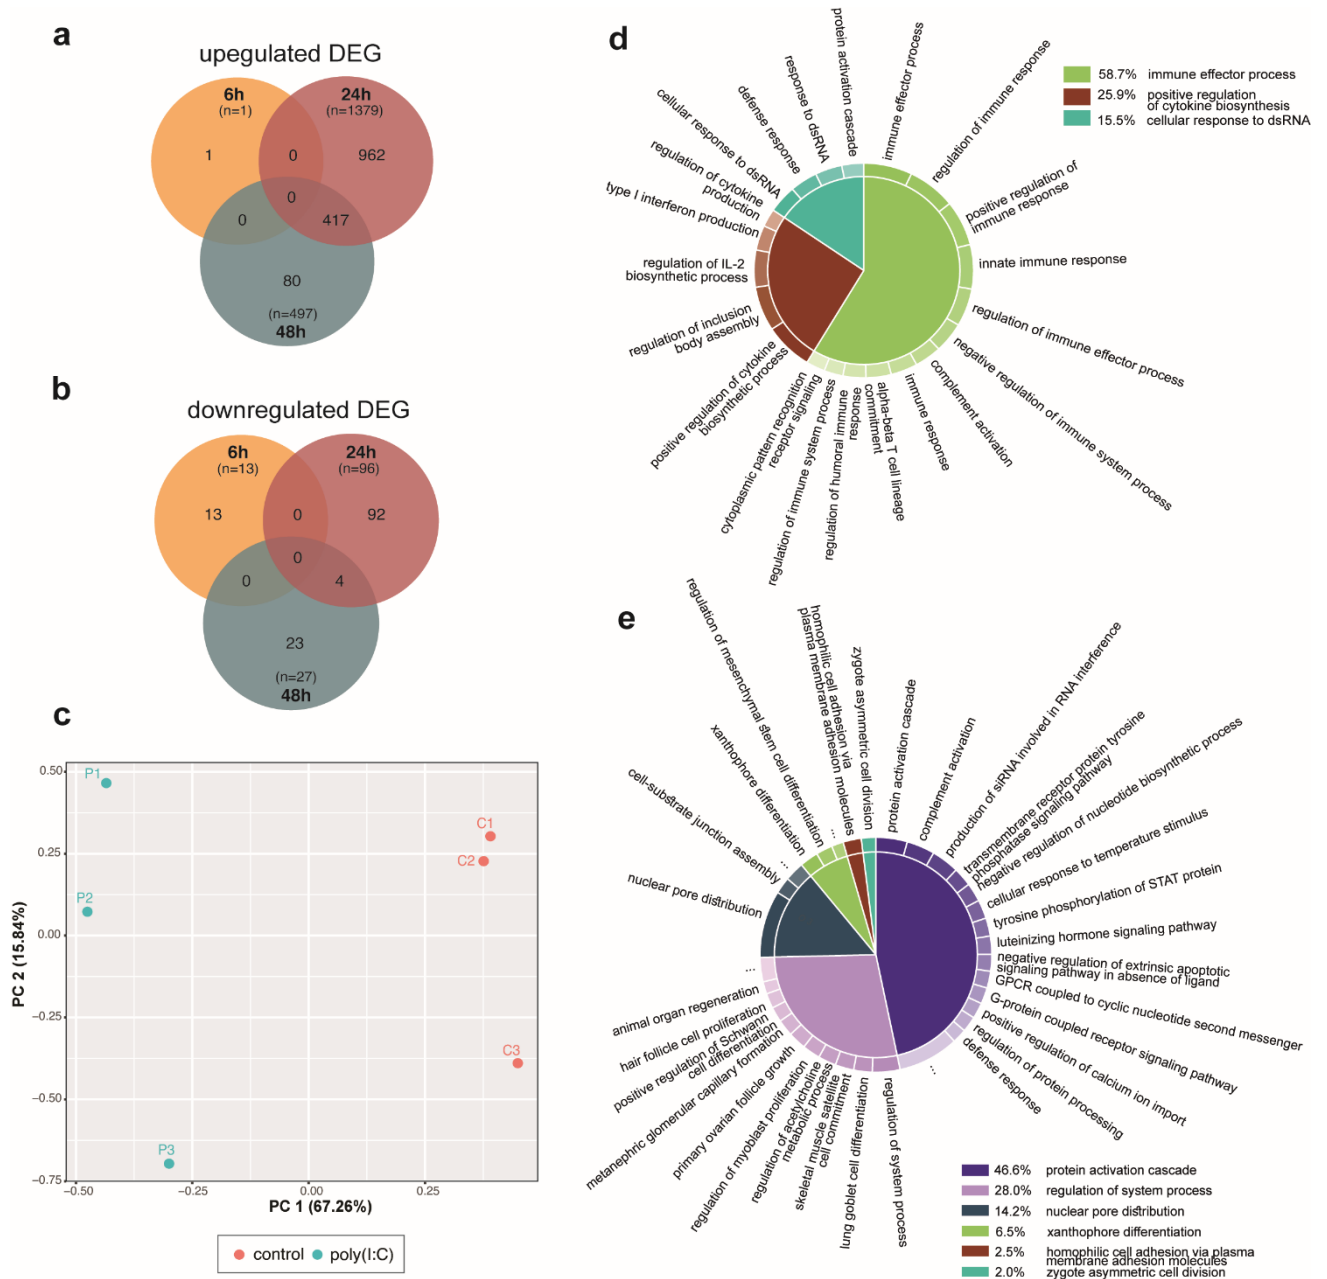

316 **Figure 3. Signature of the innate immune response to poly(I:C).** Venn diagram of differentially  
 317 expressed genes which were (a) upregulated and (b) downregulated after poly(I:C) administration. (c)  
 318 PCA plot representing whole transcriptome of poly(I:C)-injected animals at 24 hpi. (d) GO terms  
 319 enrichment results of DEG upregulated at 24 hpi and (e) 48 hpi.

320

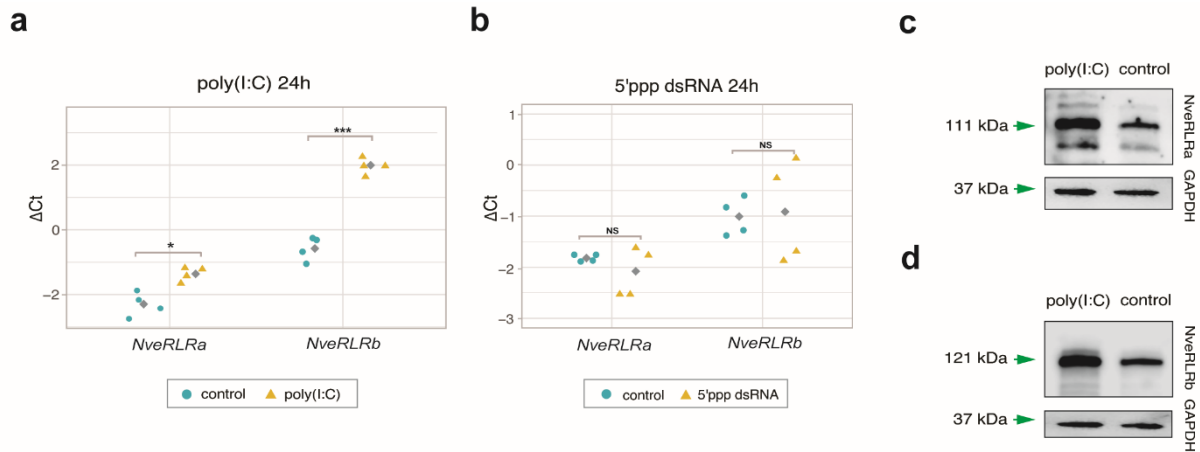

321 **Figure 4. Response of *Nematostella* putative dsRNA helicases to viral mimics.** *NveRLRs* mRNA  
 322 expression level measured by RT-qPCR in response to (a) poly(I:C) and (b) short 5' ppp dsRNA.  
 323 Grey squares represent mean values. Western blot validation of (c) NveRLRa and (d) NveRLRb  
 324 protein level in response to poly(I:C) at 48 hpi. Significance level was assessed by paired two-tailed  
 325 Student's t-test; \* p value < 0.05, \*\* p value < 0.01, \*\*\* p value < 0.001, NS – not significant.

326

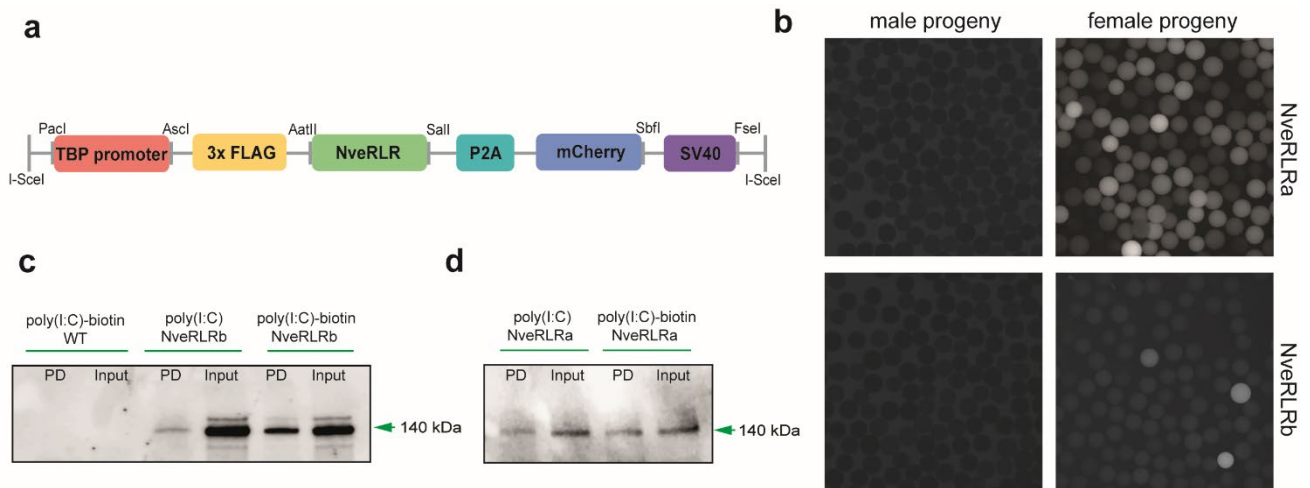

327

328 **Figure 5. NveRLRs affinity to poly(I:C).** (a) Schematic representation of the FLAG-*NveRLR*  
 329 construct (7,071 bp and 7,643 bp for *NveRLRa* and *NveRLRb*, respectively) used for transgenesis.  
 330 TBP promoter, self-cleaving P2A sequence, mCherry gene and polyadenylation signal SV40 are also  
 331 shown. (b) Maternal deposition of the FLAG-NveRLR observed after crossing transgenic females  
 332 (right panels) with WT males; fluorescent protein is missing in transgenic male progeny (left panels).  
 333 (c) Results of poly(I:C)-biotin *in vitro* binding assay showing affinity of FLAG-NveRLRb but not (d)  
 334 FLAG-NveRLRa to poly(I:C); PD – pulldown.

335



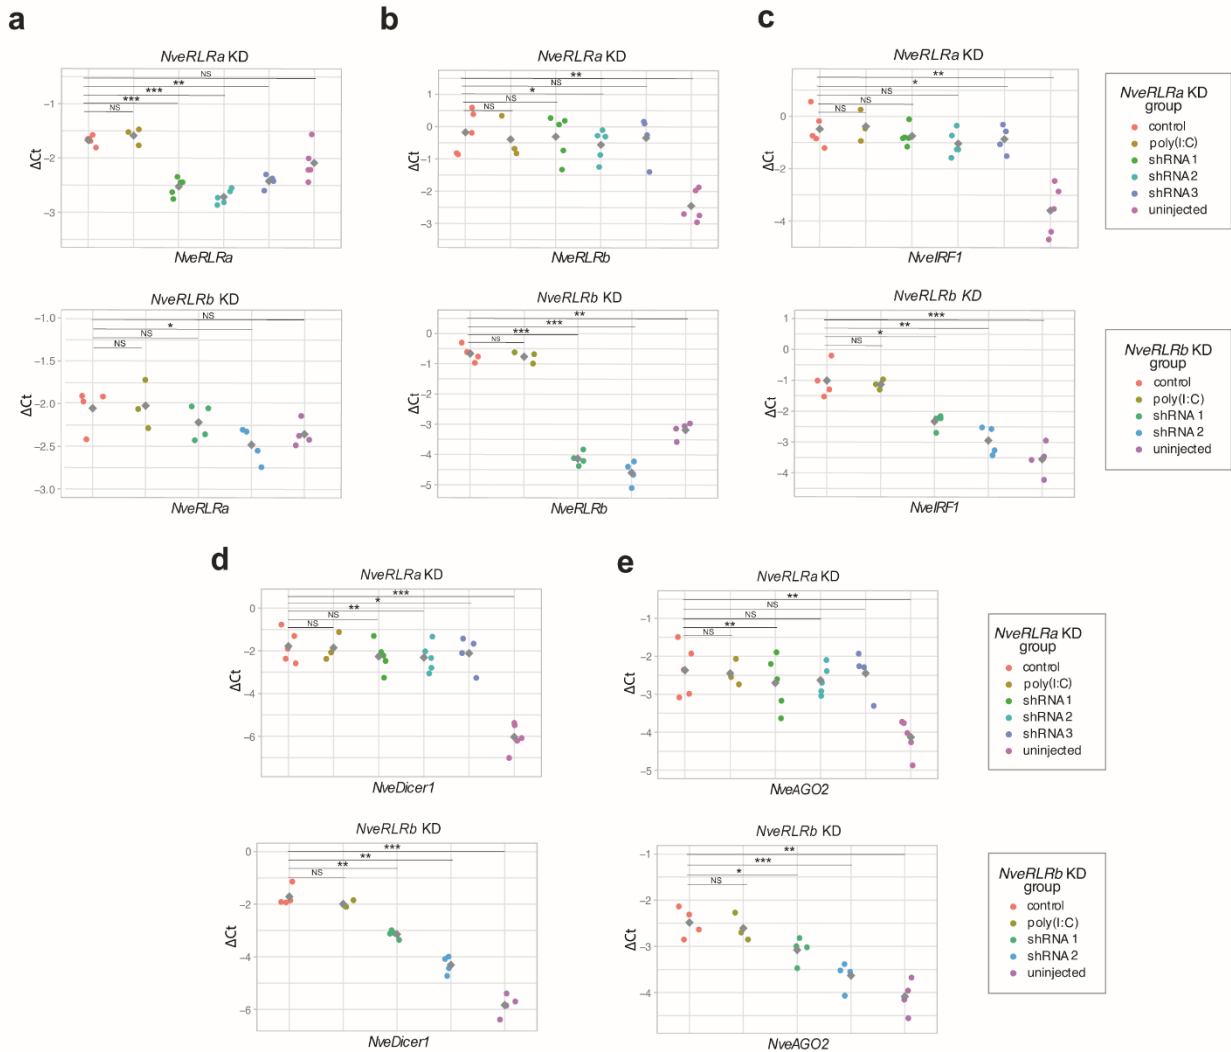

336

337 **Figure 6. Downregulation of putative antiviral innate immunity-related genes in response to**  
 338 ***NveRLRs* knockdown (KD) combined with poly(I:C) administration.** RT-qPCR results of shRNA  
 339 targeting *NveRLRa* and *NveRLRb* (upper and lower panels of each section, respectively) measuring  
 340 the expression of (a) *NveRLRa*, (b) *NveRLRb*, (c) *NveIRF1*, (d) *NveDicer1*, (e) *NveAGO2*. Grey  
 341 squares represent mean values. All comparisons were done by paired two-tailed Student's t-test  
 342 against the control shRNA. Significance level: \* p value < 0.05, \*\* p value < 0.01, \*\*\* p value  
 343 < 0.001, NS – not significant.

344

345

## 346 **Materials and Methods**

### 347 **Sea anemone culture**

348 *Nematostella* embryos, larvae and juveniles were grown in the dark at 22 °C in 16‰ artificial  
349 seawater, while polyps were grown at 18 °C and fed with *Artemia salina* nauplii three times a week.  
350 The induction of gamete spawning was performed as previously described<sup>72</sup>. The gelatinous egg sack  
351 was removed using 3% L-Cysteine (Merck Millipore, Burlington, MA, USA) and followed by  
352 microinjection of viral mimics or shRNAs.

### 353 **Injection of viral mimics**

354 To stimulate the antiviral immune response in *Nematostella*, we used two types of synthetic  
355 dsRNA. To mimic the presence of long dsRNA, we used 3.125 ng/μl of high molecular weight  
356 (HMW) poly(I:C) in 0.9% NaCl (Invivogen, San Diego, CA, USA) with an average size of 1.5 – 8 kb,  
357 and 0.9% NaCl as a control. The second type of ligand was a synthetic dsRNA 19-mer with 5'  
358 triphosphate (5'ppp-dsRNA) and a control dsRNA 19-mer with 5' hydroxyl group (5'ppp-dsRNA  
359 control), both suspended in sterile RNase-free endotoxin-free water to a final concentration of 90  
360 ng/μl (Invivogen). Each experiment was performed in triplicates and each biological replicate was  
361 composed of 100-150 injected zygotes per time point. Within each biological replicate zygotes were  
362 collected at 6, 24 and 48 hpi, flash frozen in liquid nitrogen and stored at -80 °C until processed.

### 363 **Transcriptome library preparation and sequencing**

364 Total RNA was extracted with Tri-Reagent (Sigma-Aldrich, St. Louis, MO, USA) according to  
365 manufacturer's protocol, treated with 2 μl of Turbo DNase (Thermo Fisher Scientific, Waltham, MA,  
366 USA) and re-extracted with Tri-Reagent and 20 ug of RNA-grade glycogen (Thermo Fisher  
367 Scientific). The quality of total RNA was assessed on Bioanalyzer Nanochip (Agilent, Santa Clara,  
368 CA, USA) and only samples with RNA Integrity Number (RIN) > 7 were retained. Libraries were  
369 constructed from 226 ng and 300 ng of total RNA from poly(I:C) and 5'ppp-dsRNA injected samples,  
370 respectively. RNA-seq libraries were generated using SENSE Total RNA-seq Library Prep Kit v2

371 (Lexogen, Vienna, Austria) following the manufacturer's protocol and sequenced on NextSeq 500  
372 (Illumina, San Diego, CA, USA) using single-end 75 bp chemistry.

### 373 **Raw reads processing and differential gene expression analysis**

374 Quality of raw reads was assessed and visualized with FastQC software<sup>73</sup>. Reads were trimmed  
375 and quality filtered by Trimmomatic with the following parameters (HEADCROP:9 LEADING:3  
376 TRAILING:3 SLIDINGWINDOW:4:20 MINLEN:36)<sup>74</sup> and the quality of the filtered reads was re-  
377 assessed in FastQC. Reads were mapped to *N. vectensis* genome (NCBI accession:  
378 GCA\_000209225.1)<sup>75</sup> with STAR alignment program<sup>76</sup>. Gene counts were obtained with RSEM<sup>77</sup>  
379 (genes models, protein models and annotations are available at:  
380 [https://figshare.com/articles/Nematostella\\_vectensis\\_transcriptome\\_and\\_gene\\_models\\_v2\\_0/807696](https://figshare.com/articles/Nematostella_vectensis_transcriptome_and_gene_models_v2_0/807696)).  
381 Differential gene expression analysis was carried out with edgeR<sup>78</sup> and DESeq2<sup>79</sup> implemented in the  
382 Trinity pipeline<sup>80</sup>. Treatment samples within each time point were compared to the corresponding  
383 control samples. Differentially expressed genes were defined by  $FDR < 0.05$  and  $\log_2|\text{fold change}| \geq$   
384 2. Only genes identified by both edgeR and DESeq2 methods were reported as differentially  
385 expressed. GO groups were identified by GSEA using Goseq Bioconductor package<sup>81</sup> implemented  
386 in the in-built Trinity pipeline<sup>80</sup>. An FDR cut-off of 0.05 was considered significant for the enriched  
387 or depleted GO terms. To reduce redundancy, GO terms were group based on semantic similarity  
388 using REVIGO<sup>82</sup> and visualized by CirGO v2.0<sup>83</sup>.

### 389 **shRNA generation and knockdown experiments**

390 Three shRNA precursors from three different regions of each *NveRLR* gene as well as control  
391 shRNAs were designed and prepared as previously described<sup>84</sup> with minor modifications. In brief,  
392 19 bp gene targeting motif size was chosen for each shRNA (minimum GC% content > 35%). We  
393 have introduced 2-3 mismatches to the star strand, which corresponds to the coding strand, to create  
394 the bulges in shRNA precursors following the structure of native miRNA in *Nematostella*<sup>69,85</sup>.  
395 Reverse complement sequence of shRNA precursors was synthesized as ultramer oligo by Integrated  
396 DNA Technologies (Coralville, IA, USA), mixed with T7 promoter primer in 1:1 ratio in a final

397 concentration of 25 $\mu$ M, denatured at 98 °C for 5 min and cooled to 24 °C. shRNAs were synthesized  
398 with AmpliScribe™ T7-Flash™ Transcription Kit (Epicentre, Charlotte, NC, USA) for 15 h followed  
399 by 15 min treatment with 1  $\mu$ l of DNase I. The in-vitro transcribed products were purified using the  
400 Quick-RNA Miniprep Kit (Zymo Research, Irvine, CA, USA). The quality and size of each precursor  
401 were checked on 1.5% agarose gel and its concentration was measured by spectrophotometer. The  
402 sequences of shRNAs precursors are provided in **Supplementary File S5**.

403 Initial screening of shRNA knockdown efficiency and toxicity revealed that microinjections of  
404 shRNAs of *NveRLRa* and *NveRLRb* proved effective and non-toxic at 48 hpi in 750-1000 ng/ $\mu$ l and  
405 350-500 ng/ $\mu$ l concentration range, respectively. 3 shRNAs for *NveRLRa* (750 ng/ $\mu$ l, 750 ng/ $\mu$ l and  
406 1000 ng/ $\mu$ l) and 2 shRNAs for *NveRLRb* (500 ng/ $\mu$ l each) were microinjected to *Nematostella* zygotes  
407 in a 10  $\mu$ l mixture containing additionally 3.125 ng/ $\mu$ l of HMW poly(I:C), 1  $\mu$ l of 9% NaCl and  
408 RNase-free endotoxin-free water. Identically prepared 1000 ng/ $\mu$ l and 500 ng/ $\mu$ l of the control  
409 shRNA was included in each microinjection of *NveRLRa* and *NveRLRb* shRNAs, respectively.  
410 Moreover, in each microinjection experiment we included a subset of animals treated only with  
411 poly(I:C) 3.125 ng/ $\mu$ l to monitor the cytotoxic effect of shRNA control. Zygotes were collected at 48  
412 hpi, flash frozen in liquid nitrogen and stored at -80 °C until further processed.

### 413 **Reverse-transcription quantitative PCR**

414 To validate the results of the RNA-seq and knockdown experiments, we assayed the expression  
415 levels of several candidate immune-related genes from the mammalian RLR pathway (*NveRLRa*,  
416 *NveRLRb*, *NveOASI*, *NveIRF1*, *NveGBP1*), RNAi pathway (*NveDicer1* and *NveAGO2*) and a  
417 representative of hexacorallian-specific gene (NVE23912) by reverse-transcription quantitative PCR  
418 (RT-qPCR) at 24 hpi (RNA-seq) or 48 hpi (knockdown experiments). 3-5 biological replicates were  
419 used to validate the results of transcriptomics and poly(I:C)-shRNAs experiments, while one  
420 biological replicate was used to assess the efficiency and background immune response to shRNAs  
421 and poly(I:C) control. RNA was extracted from injected embryos following the same protocol used  
422 for RNA-seq libraries construction. cDNA was constructed using SuperScript III (Thermo Fisher

423 Scientific) for RNA-seq validation and iScript cDNA Synthesis Kit (Bio-Rad, Hercules, CA, USA)  
424 for knockdown experiments, according to the manufacturer's protocol. Real-Time PCR was prepared  
425 with Fast SYBR™ Green Master Mix (Thermo Fisher Scientific) on the StepOnePlus Real-Time PCR  
426 System (ABI, Thermo Fisher Scientific). The qPCR mixture contained cDNA template (1 µl), 2× Fast  
427 SYBR™ Green Master Mix (5 µl), primers (1 µl) and nuclease-free water to make up 10 µl total  
428 volume. qPCR thermocycling conditions were 95 °C for 20 s, 40 cycles of 95 °C for 3 s, 60 °C for 30  
429 s. Melt curve analysis was initiated with 95 °C for 15 s and performed from 60 to 95 °C in 0.5 °C  
430 increments. The expression levels of candidate genes were normalized to the NVE5273 gene ( $\Delta Ct =$   
431  $C_{t_{\text{reference gene}}} - C_{t_{\text{gene of interest}}}$ ) and the relative expression was calculated by the  $2^{\Delta\Delta Ct}$  method. The  
432 significance level was calculated by applying paired two-tailed Student's t-test to  $\Delta Ct$  values for each  
433 of the pairwise comparisons. Sequences of all primers are shown in **Supplementary File S5**.

#### 434 **Antibody generation**

435 For NveRLRa and NveRLRb Western blots following poly(I:C) stimulation, we used custom  
436 polyclonal antibodies raised against recombinant fragment antigens generated by rabbits'  
437 immunization (GenScript, Piscataway Township, NJ, USA). Each recombinant fragment was injected  
438 into three rabbits. After the third round of immunization, pre-immune and post-immune sera were sent  
439 to us for screening by Western blot against *Nematostella* lysate to identify sera specifically positive  
440 for NveRLRa and NveRLRb (bands of ~111 and ~121 kDa respectively). Finally, the antigens were  
441 used by the company for affinity purification from the relevant rabbits. Amino acid sequences of  
442 NveRLRa and NveRLRb fragments used for immunization are presented in **Supplementary File S5**.

#### 443 **Western blot**

444 Equal amounts of protein were run on 4 – 15% Mini-PROTEAN® TGX™ Precast Protein Gel  
445 (Bio-Rad) followed by blotting to a Polyvinylidene fluoride (PVDF) membrane (Bio-Rad). Next, the  
446 membrane was washed with TBST buffer (20 mM Tris pH 7.6, 150 mM NaCl, 0.1% Tween 20) and  
447 blocked (5% skim milk in TBST) for 1 hour on the shaker at room temperature. Polyclonal antibody  
448 against NveRLRa or NveRLRb or monoclonal mouse anti-FLAG M2 antibody (Sigma-Aldrich) or

449 monoclonal mouse anti-GAPDH (Abcam, Cambridge, UK) serving as loading control was diluted  
450 1:1000 in TBST containing 5% BSA (MP Biomedicals, Irvine, CA, USA) and incubated with the  
451 membrane in a sealed sterile plastic bag at 4°C overnight. The membrane was washed three times  
452 with TBST for 10 min and incubated for 1 hour with 1:10,000 diluted peroxidase-conjugated anti-  
453 mouse or anti-rabbit antibody (Jackson ImmunoResearch, West Grove, PA, USA) in 5% skim milk in  
454 TBST. Finally, the membrane was washed three times with TBST and detection was performed with  
455 the Clarity™ Max ECL kit for pulldown experiments (Bio-Rad) and Clarity™ ECL kit for all other  
456 experiments (Bio-Rad) according to the manufacturer's instructions and visualized with a CCD  
457 camera of the Odyssey Fc imaging system (Li-COR Biosciences, USA). Size determination was  
458 carried out by simultaneously running Precision Plus Protein™ Dual Color Protein Ladder (Bio-Rad)  
459 and scanning at 700 nm wavelength.

#### 460 **Cloning and transgenesis**

461 Synthetic genes (Gene Universal, Newark, DE, USA) including CDS of *NveRLRa* and *NveRLRb*  
462 (scaffold\_15:1090025-1101489 and scaffold\_40:683898-697394, respectively), self-cleaving porcine  
463 teschovirus-1 2A sequence (P2A)<sup>86</sup> and mCherry sequence<sup>87</sup> were amplified with Q5® Hot Start  
464 High-Fidelity DNA Polymerase (New England Biolabs, Ipswich, MA, USA), visualized on 1%  
465 agarose gel and purified by NucleoSpin Gel and PCR Clean-up (Macherey-Nagel, Düren, Germany).  
466 Following digestion with restriction enzymes, PCR fragments were ligated to a pER242<sup>88</sup> vector  
467 containing a TBP promoter previously proved to drive ubiquitous expression in *Nematostella*<sup>89</sup>, three  
468 N-terminal FLAG tags and SV40 polyadenylation signal. Plasmids were transformed into the *E. coli*  
469 DH5α (New England Biolabs) strain and outsourced for Sanger sequencing (HyLabs, Rehovot,  
470 Israel). Each *NveRLR* plasmid was subsequently injected into *N. vectensis* zygotes along with the  
471 yeast meganuclease I-SceI (New England Biolabs) to enable genomic integration<sup>88,90</sup>. Transgenic  
472 animals were visualized under an SMZ18 stereomicroscope equipped with a DS-Qi2 camera (Nikon,  
473 Tokyo, Japan) and positive animals were reared to the adult stage. At approximately 4 months old F<sub>0</sub>  
474 individuals were induced for gametes and crossed with wild-type animals to generate F<sub>1</sub> FLAG-  
475 tagged TBP::*NveRLR*::mCherry heterozygotes. Positive F<sub>1</sub> individuals were selected and grown to

476 the adult stage. For the in vitro binding assay, only F<sub>1</sub> females descending from a single F<sub>0</sub> founder of  
477 each NveRLR line were used. Sequences of all used primers are provided in **Supplementary File S5**.

#### 478 ***In vitro* binding assay**

479 Maternal deposition of FLAG-tagged TBP::NveRLR::mCherry transgene in F<sub>2</sub> animals was  
480 visualized under an SMZ18 stereomicroscope equipped with a DS-Qi2 camera (Nikon) and confirmed  
481 by Western blotting. Following fertilization with wild-type gametes, F<sub>2</sub> FLAG-tagged  
482 TBP::NveRLR::mCherry and wild-type zygotes were treated with 3% L-Cysteine (Merck Millipore),  
483 washed and snap frozen in liquid nitrogen. Next, animals were mechanically homogenized in the  
484 following lysis buffer: 50 mM Tris-HCl (pH 7.4), 150 mM KCl, 0.5% NP-40, 10% glycerol, Protease  
485 inhibitor cOmplete ULTRA tablets (Roche, Basel, Switzerland) and Protease Inhibitor Cocktail Set III,  
486 EDTA-Free (Merck Millipore). Protease inhibitors were added fresh just before use. After 1 h rotation  
487 in 4°C the samples were centrifuged at 16000 × g, 15 min, 4 °C and supernatant was collected. Protein  
488 concentration was measured using Pierce BCA Protein Assay Kit (Thermo Fisher Scientific). Next, the  
489 lysate was pre-cleared as following: 100 µl of streptavidin magnetic beads (New England Biolabs) were  
490 washed in 1 ml of 1×PBS for 3 times and the FLAG-tagged TBP::NveRLR/wild-type lysate was added  
491 to the washed beads. Lysis buffer was added to make up 1.2 ml and samples were incubated at 4 °C  
492 rotation for 1 hour. After the incubation, the pre-cleared lysates were collected and mixed with the  
493 HMW poly(I:C) (Invivogen) or HMW poly(I:C)-biotin (Invivogen) in the final concentration of 30  
494 ng/ml and ATP (New England Biolabs) in the final concentration of 0.5 mM. Samples were incubated  
495 for 1 h in rotation at room temperature. Simultaneously, 100 µl of fresh streptavidin magnetic beads  
496 were blocked with wild-type lysates alike in the pre-clearing step. poly(I:C) samples were added to the  
497 blocked beads and incubated for 2 h in rotation at 4 °C for poly(I:C)-biotin pulldown. After the  
498 incubation, the lysates were discarded and the beads were washed 3 times with 500 µl of the following  
499 wash buffer: 50 mM Tris-HCl (pH 7.4), Protease inhibitor cOmplete ULTRA tablets (Roche) and  
500 Protease Inhibitor Cocktail Set III, EDTA-Free (Merck Millipore). Subsequently, 40 µl of filtered  
501 double-distilled water and 20 µl of Blue Protein Loading Dye (New England Biolabs) were added to

502 the beads. The samples were heated at 100 °C for 8 min and placed on ice for 1 min, then centrifuged  
503 1 min at 21,000 × g at 4 °C, and the supernatant was collected for Western blot.

#### 504 **Phylogenetic analysis**

505 To construct an informative phylogenetic tree we selected representatives of major groups  
506 carrying RLRs: vertebrates (a fish, an amphibian, and a mammal), two non-vertebrate chordates (a  
507 lancelet and a lamprey), nematodes (*C. elegans* and *A. suum*), two lophotrochozoans (an oyster and an  
508 annelid) and hexacorallians (three sea anemones, each representing a different major sea anemone  
509 clade and two-reef building corals). Sponges RLRs sequences were chosen as an outgroup. The RLRs  
510 amino acid sequences were aligned using MUSCLE<sup>91</sup> and low certainty alignment regions were  
511 removed by TrimAl<sup>92</sup> using the –automatic1 for heuristic model selection. The maximum-likelihood  
512 phylogenetic trees were constructed using IQ-Tree<sup>93</sup> with the LG+F+R5 model which was the best  
513 fitting model both according to the Bayesian information criterion (BIC) and corrected Akaike  
514 information criterion. Support values of the ML tree were calculated using 1,000 ultrafast bootstrap  
515 replicates<sup>94</sup>. A Bayesian tree was constructed using MrBayes<sup>95</sup> with the WAG +I +G model and the  
516 run lasted 5,000,000 generations with every 100th generation being sampled. The Bayesian analysis  
517 was estimated to reach convergence when the potential scale reduction factor (PSRF) reached 1.0.  
518 Consensus domain composition was predicted by simultaneous search in Pfam<sup>96</sup> and NCBI Conserved  
519 Domains<sup>97</sup> databases run with default parameters.

520 Homologs of NVE23912 sequences were identified through a search in TSA and NCBI nr  
521 databases and *Nematostella* gene models. Amino acid sequences were aligned using MUSCLE<sup>91</sup> and  
522 visualized by CLC Genomics Workbench. Details of RLRs and NVE23912 homolog sequences used  
523 in the analysis are available in **Supplementary File S6**.

#### 524 **Promoter sequence analysis of DEG**

525 Analysis of promoter sequences was performed as previously described<sup>45</sup> with minor  
526 modifications. In brief, coordinates of the TSS were retrieved from



527 nveGenes.vienna130208.nemVec1.bed file. We subset the upregulated DEG identified by poly(I:C)  
528 microinjection (n=1379) and the fraction of top 10% genes (n=138) and top 20% genes (n=276),  
529 setting the whole transcriptome as the background (n=18831). TATA box-containing genes were  
530 identified using FIMO<sup>98</sup> by having at least one statistically significant match (p-value cut-off of  
531 <0.05) to the TATA box consensus motif (MA0108.1) retrieved from JASPAR server<sup>99</sup>. Due to  
532 uncertainty in TSS calling, we have scanned the coding strand in two ways: a) narrow search included  
533 38 bp upstream of TSS; b) wide search spanned both 100 bp upstream and 100 bp downstream of  
534 putative TSS whenever fitted in the scaffold boundaries. To estimate motifs enrichment in the same  
535 groups, we used the non-redundant JASPAR core motif matrix (pfm\_vertebrates.txt) and run AME<sup>100</sup>  
536 in one-tailed Fisher's exact test mode. The searching region included 500 bp upstream of the putative  
537 TSS, the first exon and the first intron of the gene. For motif identification, the cut-off of adjusted by  
538 Bonferroni correction p-value < 0.05 was considered significant statistically significant. The presence  
539 of the signal peptide in each protein sequence was predicted by SignalP 4.1 Server with default  
540 settings<sup>101</sup>.

#### 541 **Data availability**

542 All sequencing data that support the findings of this study have been deposited in the National Center  
543 for Biotechnology Information Sequence Read Archive (SRA) and are accessible through the  
544 BioProject accession number PRJNA673983. Source data for Fig. 2,3c and Supplementary Fig.  
545 1a,b,c,d,e have been provided in Supplementary File S1. Source data for Fig. 4a,b, 6 and  
546 Supplementary Fig. 6 have been provided in Supplementary File S4. All other relevant data are  
547 available from the corresponding authors on request.

#### 548 **References**

- 549 1 Koonin, E. V. & Dolja, V. V. A virocentric perspective on the evolution of life. *Curr Opin Virol* **3**,  
550 546-557, doi:10.1016/j.coviro.2013.06.008 (2013).
- 551 2 tenOever, B. R. The Evolution of Antiviral Defense Systems. *Cell Host Microbe* **19**, 142-149,  
552 doi:10.1016/j.chom.2016.01.006 (2016).

- 553 3 Bernheim, A. *et al.* Prokaryotic viperins produce diverse antiviral molecules. *Nature*,  
554 doi:10.1038/s41586-020-2762-2 (2020).
- 555 4 Cohen, D. *et al.* Cyclic GMP-AMP signalling protects bacteria against viral infection. *Nature* **574**,  
556 691-695, doi:10.1038/s41586-019-1605-5 (2019).
- 557 5 Morehouse, B. R. *et al.* STING cyclic dinucleotide sensing originated in bacteria. *Nature*,  
558 doi:10.1038/s41586-020-2719-5 (2020).
- 559 6 Barrat, F. J., Elkon, K. B. & Fitzgerald, K. A. Importance of Nucleic Acid Recognition in  
560 Inflammation and Autoimmunity. *Annu Rev Med* **67**, 323-336, doi:10.1146/annurev-med-052814-  
561 023338 (2016).
- 562 7 Hartmann, G. Nucleic Acid Immunity. *Adv Immunol* **133**, 121-169, doi:10.1016/bs.ai.2016.11.001  
563 (2017).
- 564 8 Weber, F., Wagner, V., Rasmussen, S. B., Hartmann, R. & Paludan, S. R. Double-stranded RNA is  
565 produced by positive-strand RNA viruses and DNA viruses but not in detectable amounts by  
566 negative-strand RNA viruses. *J Virol* **80**, 5059-5064, doi:10.1128/JVI.80.10.5059-5064.2006  
567 (2006).
- 568 9 Schlee, M. *et al.* Recognition of 5' triphosphate by RIG-I helicase requires short blunt double-  
569 stranded RNA as contained in panhandle of negative-strand virus. *Immunity* **31**, 25-34,  
570 doi:10.1016/j.immuni.2009.05.008 (2009).
- 571 10 Liu, G., Park, H. S., Pyo, H. M., Liu, Q. & Zhou, Y. Influenza A Virus Panhandle Structure Is  
572 Directly Involved in RIG-I Activation and Interferon Induction. *J Virol* **89**, 6067-6079,  
573 doi:10.1128/JVI.00232-15 (2015).
- 574 11 Wang, X. H. *et al.* RNA interference directs innate immunity against viruses in adult *Drosophila*.  
575 *Science* **312**, 452-454, doi:10.1126/science.1125694 (2006).
- 576 12 Szittyá, G. & Burgyan, J. RNA interference-mediated intrinsic antiviral immunity in plants. *Curr*  
577 *Top Microbiol Immunol* **371**, 153-181, doi:10.1007/978-3-642-37765-5\_6 (2013).
- 578 13 Felix, M. A. *et al.* Natural and experimental infection of *Caenorhabditis* nematodes by novel  
579 viruses related to nodaviruses. *PLoS Biol* **9**, e1000586, doi:10.1371/journal.pbio.1000586 (2011).

- 580 14 Lewis, S. H. *et al.* Pan-arthropod analysis reveals somatic piRNAs as an ancestral defence against  
581 transposable elements. *Nat Ecol Evol* **2**, 174-181, doi:10.1038/s41559-017-0403-4 (2018).
- 582 15 Yoneyama, M. *et al.* The RNA helicase RIG-I has an essential function in double-stranded RNA-  
583 induced innate antiviral responses. *Nat Immunol* **5**, 730-737, doi:10.1038/ni1087 (2004).
- 584 16 Yoneyama, M. *et al.* Shared and Unique Functions of the DExD/H-Box Helicases RIG-I, MDA5,  
585 and LGP2 in Antiviral Innate Immunity. *The Journal of Immunology* **175**, 2851,  
586 doi:10.4049/jimmunol.175.5.2851 (2005).
- 587 17 Kang, D.-c. *et al.* mda-5: An interferon-inducible putative RNA helicase with double-stranded  
588 RNA-dependent ATPase activity and melanoma growth-suppressive properties. *Proceedings of the*  
589 *National Academy of Sciences of the United States of America* **99**, 637-642,  
590 doi:10.1073/pnas.022637199 (2002).
- 591 18 Ren, X., Linehan, M. M., Iwasaki, A. & Pyle, A. M. RIG-I Recognition of RNA Targets: The  
592 Influence of Terminal Base Pair Sequence and Overhangs on Affinity and Signaling. *Cell Rep* **29**,  
593 3807-3815 e3803, doi:10.1016/j.celrep.2019.11.052 (2019).
- 594 19 Schmidt, A. *et al.* 5'-triphosphate RNA requires base-paired structures to activate antiviral  
595 signaling via RIG-I. *Proc Natl Acad Sci U S A* **106**, 12067-12072, doi:10.1073/pnas.0900971106  
596 (2009).
- 597 20 Hornung, V. *et al.* 5'-Triphosphate RNA is the ligand for RIG-I. *Science* **314**, 994-997,  
598 doi:10.1126/science.1132505 (2006).
- 599 21 Goubau, D. *et al.* Antiviral immunity via RIG-I-mediated recognition of RNA bearing 5'-  
600 diphosphates. *Nature* **514**, 372-375, doi:10.1038/nature13590 (2014).
- 601 22 Pichlmair, A. *et al.* RIG-I-mediated antiviral responses to single-stranded RNA bearing 5'-  
602 phosphates. *Science* **314**, 997-1001, doi:10.1126/science.1132998 (2006).
- 603 23 Pichlmair, A. *et al.* Activation of MDA5 requires higher-order RNA structures generated during  
604 virus infection. *J Virol* **83**, 10761-10769, doi:10.1128/JVI.00770-09 (2009).
- 605 24 Peisley, A. *et al.* Kinetic mechanism for viral dsRNA length discrimination by MDA5 filaments.  
606 *Proc Natl Acad Sci U S A* **109**, E3340-3349, doi:10.1073/pnas.1208618109 (2012).

- 607 25 Kato, H. *et al.* Length-dependent recognition of double-stranded ribonucleic acids by retinoic acid-  
608 inducible gene-I and melanoma differentiation-associated gene 5. *J Exp Med* **205**, 1601-1610,  
609 doi:10.1084/jem.20080091 (2008).
- 610 26 Kato, H. *et al.* Differential roles of MDA5 and RIG-I helicases in the recognition of RNA viruses.  
611 *Nature* **441**, 101-105, doi:10.1038/nature04734 (2006).
- 612 27 Rehwinkel, J. & Gack, M. U. RIG-I-like receptors: their regulation and roles in RNA sensing. *Nat*  
613 *Rev Immunol* **20**, 537-551, doi:10.1038/s41577-020-0288-3 (2020).
- 614 28 Rodriguez, K. R., Bruns, A. M. & Horvath, C. M. MDA5 and LGP2: accomplices and antagonists  
615 of antiviral signal transduction. *J Virol* **88**, 8194-8200, doi:10.1128/JVI.00640-14 (2014).
- 616 29 Technau, U. & Steele, R. E. Evolutionary crossroads in developmental biology: Cnidaria.  
617 *Development* **138**, 1447-1458, doi:10.1242/dev.048959 (2011).
- 618 30 Layden, M. J., Rentzsch, F. & Rottinger, E. The rise of the starlet sea anemone *Nematostella*  
619 *vectensis* as a model system to investigate development and regeneration. *Wiley Interdiscip Rev*  
620 *Dev Biol* **5**, 408-428, doi:10.1002/wdev.222 (2016).
- 621 31 Kenny, N. J. *et al.* Tracing animal genomic evolution with the chromosomal-level assembly of the  
622 freshwater sponge *Ephydatia muelleri*. *Nat Commun* **11**, 3676, doi:10.1038/s41467-020-17397-w  
623 (2020).
- 624 32 Whelan, N. V. *et al.* Ctenophore relationships and their placement as the sister group to all other  
625 animals. *Nat Ecol Evol* **1**, 1737-1746, doi:10.1038/s41559-017-0331-3 (2017).
- 626 33 Mukherjee, K., Korithoski, B. & Kolaczowski, B. Ancient origins of vertebrate-specific innate  
627 antiviral immunity. *Mol Biol Evol* **31**, 140-153, doi:10.1093/molbev/mst184 (2014).
- 628 34 Zou, J., Chang, M., Nie, P. & Secombes, C. J. Origin and evolution of the RIG-I like RNA  
629 helicase gene family. *BMC Evol Biol* **9**, 85, doi:10.1186/1471-2148-9-85 (2009).
- 630 35 Sarkar, D., Desalle, R. & Fisher, P. B. Evolution of MDA-5/RIG-I-dependent innate immunity:  
631 independent evolution by domain grafting. *Proc Natl Acad Sci U S A* **105**, 17040-17045,  
632 doi:10.1073/pnas.0804956105 (2008).
- 633 36 Quattrini, A. M. *et al.* Palaeoclimate ocean conditions shaped the evolution of corals and their  
634 skeletons through deep time. *Nat Ecol Evol*, doi:10.1038/s41559-020-01291-1 (2020).

- 635 37 Helm, R. R., Siebert, S., Tulin, S., Smith, J. & Dunn, C. W. Characterization of differential  
636 transcript abundance through time during *Nematostella vectensis* development. *BMC Genomics*  
637 **14**, 266, doi:10.1186/1471-2164-14-266 (2013).
- 638 38 Andresen, A. M. S., Boudinot, P. & Gjoen, T. Kinetics of transcriptional response against poly  
639 (I:C) and infectious salmon anemia virus (ISAV) in Atlantic salmon kidney (ASK) cell line. *Dev*  
640 *Comp Immunol* **110**, 103716, doi:10.1016/j.dci.2020.103716 (2020).
- 641 39 Chen, Y. *et al.* Gene expression profile after activation of RIG-I in 5'ppp-dsRNA challenged DF1.  
642 *Dev Comp Immunol* **65**, 191-200, doi:10.1016/j.dci.2016.07.009 (2016).
- 643 40 Wang, Y., Wang, X., Li, J., Zhou, Y. & Ho, W. RIG-I activation inhibits HIV replication in  
644 macrophages. *J Leukoc Biol* **94**, 337-341, doi:10.1189/jlb.0313158 (2013).
- 645 41 Kulkarni, R. R. *et al.* Activation of the RIG-I pathway during influenza vaccination enhances the  
646 germinal center reaction, promotes T follicular helper cell induction, and provides a dose-sparing  
647 effect and protective immunity. *Journal of virology* **88**, 13990-14001, doi:10.1128/JVI.02273-14  
648 (2014).
- 649 42 Draper, D. E. A guide to ions and RNA structure. *RNA* **10**, 335-343, doi:10.1261/rna.5205404  
650 (2004).
- 651 43 Schneider, W. M., Chevillotte, M. D. & Rice, C. M. Interferon-stimulated genes: a complex web of  
652 host defenses. *Annu Rev Immunol* **32**, 513-545, doi:10.1146/annurev-immunol-032713-120231  
653 (2014).
- 654 44 Wang, P. H. & He, J. G. Nucleic Acid Sensing in Invertebrate Antiviral Immunity. *Int Rev Cell*  
655 *Mol Biol* **345**, 287-360, doi:10.1016/bs.ircmb.2018.11.002 (2019).
- 656 45 Hagai, T. *et al.* Gene expression variability across cells and species shapes innate immunity.  
657 *Nature* **563**, 197-202, doi:10.1038/s41586-018-0657-2 (2018).
- 658 46 Zaslavsky, E. *et al.* Antiviral response dictated by choreographed cascade of transcription factors.  
659 *J Immunol* **184**, 2908-2917, doi:10.4049/jimmunol.0903453 (2010).
- 660 47 Seifert, L. L. *et al.* The ETS transcription factor ELF1 regulates a broadly antiviral program  
661 distinct from the type I interferon response. *PLoS Pathog* **15**, e1007634,  
662 doi:10.1371/journal.ppat.1007634 (2019).

- 663 48 Chiang, H. S. & Liu, H. M. The Molecular Basis of Viral Inhibition of IRF- and STAT-Dependent  
664 Immune Responses. *Front Immunol* **9**, 3086, doi:10.3389/fimmu.2018.03086 (2018).
- 665 49 Gallant, S. & Gilkeson, G. ETS transcription factors and regulation of immunity. *Archivum*  
666 *immunologiae et therapiae experimentalis* **54**, 149-163, doi:10.1007/s00005-006-0017-z (2006).
- 667 50 Columbus-Shenkar, Y. Y. *et al.* Dynamics of venom composition across a complex life cycle. *Elife*  
668 **7**, e35014, doi:10.7554/eLife.35014 (2018).
- 669 51 Lotan, T. *et al.* Evolutionary conservation of the mature oocyte proteome. *EuPA Open Proteomics*  
670 **3**, 27-36, doi:<https://doi.org/10.1016/j.euprot.2014.01.003> (2014).
- 671 52 Levitan, S. *et al.* The making of an embryo in a basal metazoan: Proteomic analysis in the sea  
672 anemone *Nematostella vectensis*. *Proteomics* **15**, 4096-4104, doi:10.1002/pmic.201500255 (2015).
- 673 53 Schubert-Wagner, C. *et al.* A Conserved Histidine in the RNA Sensor RIG-I Controls Immune  
674 Tolerance to N1-2'O-Methylated Self RNA. *Immunity* **43**, 41-51,  
675 doi:10.1016/j.immuni.2015.06.015 (2015).
- 676 54 Grunberg-Manago, M., Ortiz, P. J. & Ochoa, S. Enzymic synthesis of polynucleotides I.  
677 polynucleotide phosphorylase of *Azotobacter vinelandii*. *Biochimica et Biophysica Acta* **20**, 269-  
678 285, doi:[https://doi.org/10.1016/0006-3002\(56\)90286-4](https://doi.org/10.1016/0006-3002(56)90286-4) (1956).
- 679 55 Tirosh, I. & Barkai, N. Two strategies for gene regulation by promoter nucleosomes. *Genome Res*  
680 **18**, 1084-1091, doi:10.1101/gr.076059.108 (2008).
- 681 56 Newman, J. R. S. *et al.* Single-cell proteomic analysis of *S. cerevisiae* reveals the architecture of  
682 biological noise. *Nature* **441**, 840-846, doi:10.1038/nature04785 (2006).
- 683 57 Huang, B. *et al.* Characterization of the Mollusc RIG-I/MAVS Pathway Reveals an Archaic  
684 Antiviral Signalling Framework in Invertebrates. *Sci Rep* **7**, 8217, doi:10.1038/s41598-017-08566-  
685 x (2017).
- 686 58 He, Y. *et al.* Transcriptome analysis reveals strong and complex antiviral response in a mollusc.  
687 *Fish Shellfish Immunol* **46**, 131-144, doi:10.1016/j.fsi.2015.05.023 (2015).
- 688 59 Lv, X. *et al.* The Dicer from oyster *Crassostrea gigas* functions as an intracellular recognition  
689 molecule and effector in anti-viral immunity. *Fish Shellfish Immunol* **95**, 584-594,  
690 doi:10.1016/j.fsi.2019.10.067 (2019).

- 691 60 Lu, M. *et al.* A conserved interferon regulation factor 1 (IRF-1) from Pacific oyster *Crassostrea*  
692 *gigas* functioned as an activator of IFN pathway. *Fish Shellfish Immunol* **76**, 68-77,  
693 doi:10.1016/j.fsi.2018.02.024 (2018).
- 694 61 Guo, X., Zhang, R., Wang, J., Ding, S. W. & Lu, R. Homologous RIG-I-like helicase proteins  
695 direct RNAi-mediated antiviral immunity in *C. elegans* by distinct mechanisms. *Proc Natl Acad*  
696 *Sci U S A* **110**, 16085-16090, doi:10.1073/pnas.1307453110 (2013).
- 697 62 Lu, R., Yigit, E., Li, W.-X. & Ding, S.-W. An RIG-I-Like RNA helicase mediates antiviral RNAi  
698 downstream of viral siRNA biogenesis in *Caenorhabditis elegans*. *PLoS pathogens* **5**, e1000286-  
699 e1000286, doi:10.1371/journal.ppat.1000286 (2009).
- 700 63 Ashe, A. *et al.* A deletion polymorphism in the *Caenorhabditis elegans* RIG-I homolog disables  
701 viral RNA dicing and antiviral immunity. *eLife* **2**, e00994-e00994, doi:10.7554/eLife.00994  
702 (2013).
- 703 64 Bernier, A. & Sagan, S. M. The Diverse Roles of microRNAs at the Host-Virus Interface. *Viruses*  
704 **10**, 440, doi:10.3390/v10080440 (2018).
- 705 65 Zhang, Q.-L. *et al.* Transcriptome-wide analysis of immune-responsive microRNAs against poly  
706 (I:C) challenge in *Branchiostoma belcheri* by deep sequencing and bioinformatics. *Oncotarget* **8**,  
707 73590-73602, doi:10.18632/oncotarget.20570 (2017).
- 708 66 Wang, J. *et al.* MicroRNA Transcriptome of Poly I:C-Stimulated Peripheral Blood Mononuclear  
709 Cells Reveals Evidence for MicroRNAs in Regulating Host Response to RNA Viruses in Pigs. *Int*  
710 *J Mol Sci* **17**, 1601, doi:10.3390/ijms17101601 (2016).
- 711 67 Wu, J. *et al.* MicroRNA transcriptome analysis of poly I:C-stimulated and PRRSV-infected  
712 porcine alveolar macrophages. *Journal of applied genetics* **60**, 375-383, doi:10.1007/s13353-019-  
713 00500-3 (2019).
- 714 68 Singaravelu, R. *et al.* A conserved miRNA-183 cluster regulates the innate antiviral response. *J*  
715 *Biol Chem* **294**, 19785-19794, doi:10.1074/jbc.RA119.010858 (2019).
- 716 69 Fridrich, A., Modepalli, V., Lewandowska, M., Aharoni, R. & Moran, Y. Unravelling the  
717 developmental and functional significance of an ancient Argonaute duplication. *bioRxiv*,  
718 2020.2002.2004.933887, doi:10.1101/2020.02.04.933887 (2020).

- 719 70 Kawasaki, T. & Kawai, T. Toll-like receptor signaling pathways. *Front Immunol* **5**, 461,  
720 doi:10.3389/fimmu.2014.00461 (2014).
- 721 71 Brennan, J. J. *et al.* Sea anemone model has a single Toll-like receptor that can function in  
722 pathogen detection, NF-kappaB signal transduction, and development. *Proc Natl Acad Sci U S A*  
723 **114**, E10122-E10131, doi:10.1073/pnas.1711530114 (2017).
- 724 72 Genikhovich, G. & Technau, U. Induction of spawning in the starlet sea anemone *Nematostella*  
725 *vectensis*, in vitro fertilization of gametes, and dejellying of zygotes. *Cold Spring Harb Protoc*  
726 **2009**, pdb prot5281, doi:10.1101/pdb.prot5281 (2009).
- 727 73 Andrew, S. *FastQC: A quality control tool for high throughput sequence data*,  
728 <<http://www.bioinformatics.babraham.ac.uk/projects/fastqc/>> (2010).
- 729 74 Bolger, A. M., Lohse, M. & Usadel, B. Trimmomatic: a flexible trimmer for Illumina sequence  
730 data. *Bioinformatics* **30**, 2114-2120, doi:10.1093/bioinformatics/btu170 (2014).
- 731 75 Putnam, N. H. *et al.* Sea anemone genome reveals ancestral eumetazoan gene repertoire and  
732 genomic organization. *Science* **317**, 86-94, doi:10.1126/science.1139158 (2007).
- 733 76 Dobin, A. *et al.* STAR: ultrafast universal RNA-seq aligner. *Bioinformatics* **29**, 15-21,  
734 doi:10.1093/bioinformatics/bts635 (2013).
- 735 77 Li, B. & Dewey, C. N. RSEM: accurate transcript quantification from RNA-Seq data with or  
736 without a reference genome. *BMC Bioinformatics* **12**, 323, doi:10.1186/1471-2105-12-323 (2011).
- 737 78 Robinson, M. D., McCarthy, D. J. & Smyth, G. K. edgeR: a Bioconductor package for differential  
738 expression analysis of digital gene expression data. *Bioinformatics* **26**, 139-140,  
739 doi:10.1093/bioinformatics/btp616 (2010).
- 740 79 Love, M. I., Huber, W. & Anders, S. Moderated estimation of fold change and dispersion for  
741 RNA-seq data with DESeq2. *Genome Biol* **15**, 550, doi:10.1186/s13059-014-0550-8 (2014).
- 742 80 Haas, B. J. *et al.* De novo transcript sequence reconstruction from RNA-seq using the Trinity  
743 platform for reference generation and analysis. *Nat Protoc* **8**, 1494-1512,  
744 doi:10.1038/nprot.2013.084 (2013).
- 745 81 Young, M. D., Wakefield, M. J., Smyth, G. K. & Oshlack, A. Gene ontology analysis for RNA-  
746 seq: accounting for selection bias. *Genome Biol* **11**, R14, doi:10.1186/gb-2010-11-2-r14 (2010).



- 747 82 Supek, F., Bosnjak, M., Skunca, N. & Smuc, T. REVIGO summarizes and visualizes long lists of  
748 gene ontology terms. *PLoS One* **6**, e21800, doi:10.1371/journal.pone.0021800 (2011).
- 749 83 Kuznetsova, I., Lugmayr, A., Siira, S. J., Rackham, O. & Filipovska, A. CirGO: an alternative  
750 circular way of visualising gene ontology terms. *BMC Bioinformatics* **20**, 84, doi:10.1186/s12859-  
751 019-2671-2 (2019).
- 752 84 Karabulut, A., He, S., Chen, C. Y., McKinney, S. A. & Gibson, M. C. Electroporation of short  
753 hairpin RNAs for rapid and efficient gene knockdown in the starlet sea anemone, *Nematostella*  
754 *vectensis*. *Dev Biol* **448**, 7-15, doi:10.1016/j.ydbio.2019.01.005 (2019).
- 755 85 Moran, Y., Agron, M., Praher, D. & Technau, U. The evolutionary origin of plant and animal  
756 microRNAs. *Nat Ecol Evol* **1**, 27, doi:10.1038/s41559-016-0027 (2017).
- 757 86 Kim, J. H. *et al.* High cleavage efficiency of a 2A peptide derived from porcine teschovirus-1 in  
758 human cell lines, zebrafish and mice. *PLoS One* **6**, e18556, doi:10.1371/journal.pone.0018556  
759 (2011).
- 760 87 Shaner, N. C. *et al.* Improved monomeric red, orange and yellow fluorescent proteins derived from  
761 *Discosoma* sp. red fluorescent protein. *Nature biotechnology* **22**, 1567-1572, doi:10.1038/nbt1037  
762 (2004).
- 763 88 Renfer, E. & Technau, U. Meganuclease-assisted generation of stable transgenics in the sea  
764 anemone *Nematostella vectensis*. *Nat Protoc* **12**, 1844-1854, doi:10.1038/nprot.2017.075 (2017).
- 765 89 Admoni, Y., Kozlovski, I., Lewandowska, M. & Moran, Y. TATA Binding Protein (TBP)  
766 Promoter Drives Ubiquitous Expression of Marker Transgene in the Adult Sea Anemone  
767 *Nematostella vectensis*. *Genes (Basel)* **11**, doi:10.3390/genes11091081 (2020).
- 768 90 Renfer, E., Amon-Hassenzahl, A., Steinmetz, P. R. & Technau, U. A muscle-specific transgenic  
769 reporter line of the sea anemone, *Nematostella vectensis*. *Proc Natl Acad Sci U S A* **107**, 104-108,  
770 doi:10.1073/pnas.0909148107 (2010).
- 771 91 Edgar, R. C. MUSCLE: multiple sequence alignment with high accuracy and high throughput.  
772 *Nucleic acids research* **32**, 1792-1797, doi:10.1093/nar/gkh340 (2004).

- 773 92 Capella-Gutierrez, S., Silla-Martinez, J. M. & Gabaldon, T. trimAl: a tool for automated alignment  
774 trimming in large-scale phylogenetic analyses. *Bioinformatics* **25**, 1972-1973,  
775 doi:10.1093/bioinformatics/btp348 (2009).
- 776 93 Nguyen, L. T., Schmidt, H. A., von Haeseler, A. & Minh, B. Q. IQ-TREE: a fast and effective  
777 stochastic algorithm for estimating maximum-likelihood phylogenies. *Mol Biol Evol* **32**, 268-274,  
778 doi:10.1093/molbev/msu300 (2015).
- 779 94 Minh, B. Q., Nguyen, M. A. & von Haeseler, A. Ultrafast approximation for phylogenetic  
780 bootstrap. *Mol Biol Evol* **30**, 1188-1195, doi:10.1093/molbev/mst024 (2013).
- 781 95 Ronquist, F. *et al.* MrBayes 3.2: efficient Bayesian phylogenetic inference and model choice  
782 across a large model space. *Syst Biol* **61**, 539-542, doi:10.1093/sysbio/sys029 (2012).
- 783 96 El-Gebali, S. *et al.* The Pfam protein families database in 2019. *Nucleic acids research* **47**, D427-  
784 D432, doi:10.1093/nar/gky995 (2019).
- 785 97 Lu, S. *et al.* CDD/SPARCLE: the conserved domain database in 2020. *Nucleic acids research* **48**,  
786 D265-D268, doi:10.1093/nar/gkz991 (2020).
- 787 98 Grant, C. E., Bailey, T. L. & Noble, W. S. FIMO: scanning for occurrences of a given motif.  
788 *Bioinformatics* **27**, 1017-1018, doi:10.1093/bioinformatics/btr064 (2011).
- 789 99 Fornes, O. *et al.* JASPAR 2020: update of the open-access database of transcription factor binding  
790 profiles. *Nucleic acids research* **48**, D87-D92, doi:10.1093/nar/gkz1001 (2020).
- 791 100 McLeay, R. C. & Bailey, T. L. Motif Enrichment Analysis: a unified framework and an evaluation  
792 on ChIP data. *BMC Bioinformatics* **11**, 165, doi:10.1186/1471-2105-11-165 (2010).
- 793 101 Petersen, T. N., Brunak, S., von Heijne, G. & Nielsen, H. SignalP 4.0: discriminating signal  
794 peptides from transmembrane regions. *Nature methods* **8**, 785-786, doi:10.1038/nmeth.1701  
795 (2011).
